# Supplementary material for: Properties of aqueous electrolyte solutions at carbon electrodes: effects of concentration and surface charge on solution structure, ion clustering and thermodynamics in the electric double layer
Source: Royal Society of Chemistry journal article supplement (doi:10.1039/d3fd00133d), 2023-07-22
Supplement: d3fd00133d1.pdf [file d3fd00133d1.pdf]

**Properties of aqueous electrolyte solutions at carbon electrodes: effects of concentration and surface charge on solution structure, ion clustering and thermodynamics in the electric double layer**

Supporting Information

Aaron R. Finney and Matteo Salvalaglio

*Thomas Young Centre and Department of Chemical Engineering, University College  
London, London WC1E 7JE, United Kingdom*

E-mail: a.finney@ucl.ac.uk; m.salvalaglio@ucl.ac.uk

## Additional Figures

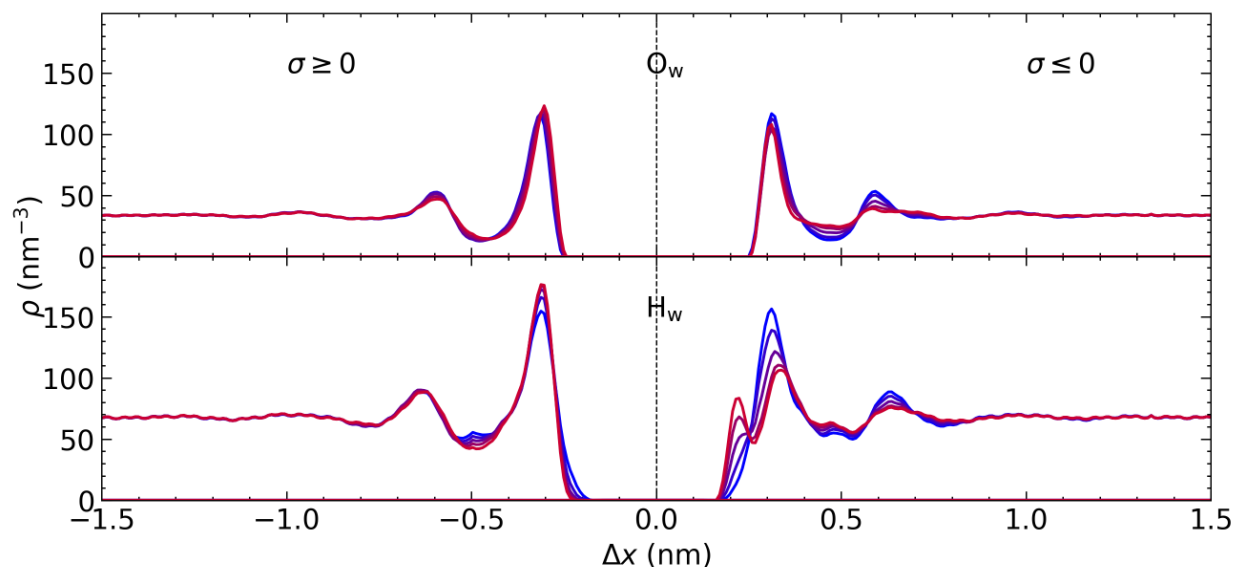

Figure S1: Water atom densities,  $\rho$ , in the steady state determined as a function of distance from the graphite electrode,  $\Delta x$ . The atom type is indicated on each panel. Colours blue→red indicate increasing graphite surface charge densities from  $|\sigma| = 0 \rightarrow 0.77 e \text{ nm}^{-2}$ , with data on the left and right of each panel pertaining to simulations with positive and negative applied surface charges, respectively.

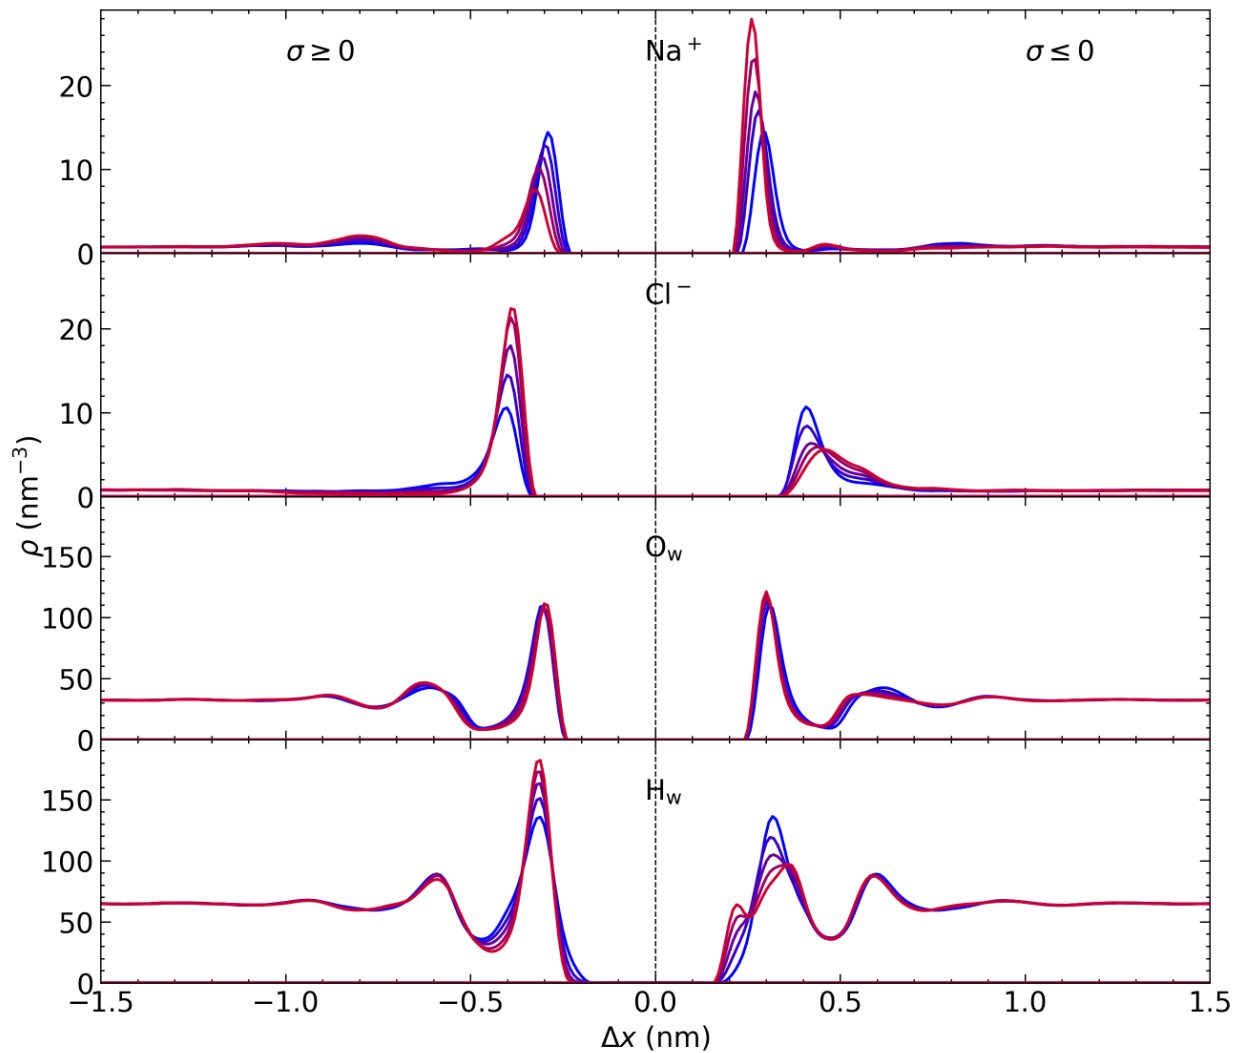

Figure S2: Water atom and ion solution densities,  $\rho$ , in the steady state determined as a function of distance from the graphite electrode,  $\Delta x$ , where the target bulk ion concentration was 1 M. The atom type is indicated on each panel. Colours blue→red indicate increasing graphite surface charge densities from  $|\sigma| = 0 \rightarrow 0.77 e \text{ nm}^{-2}$ , with data on the left and right of each panel pertaining to simulations with positive and negative applied surface charges, respectively.

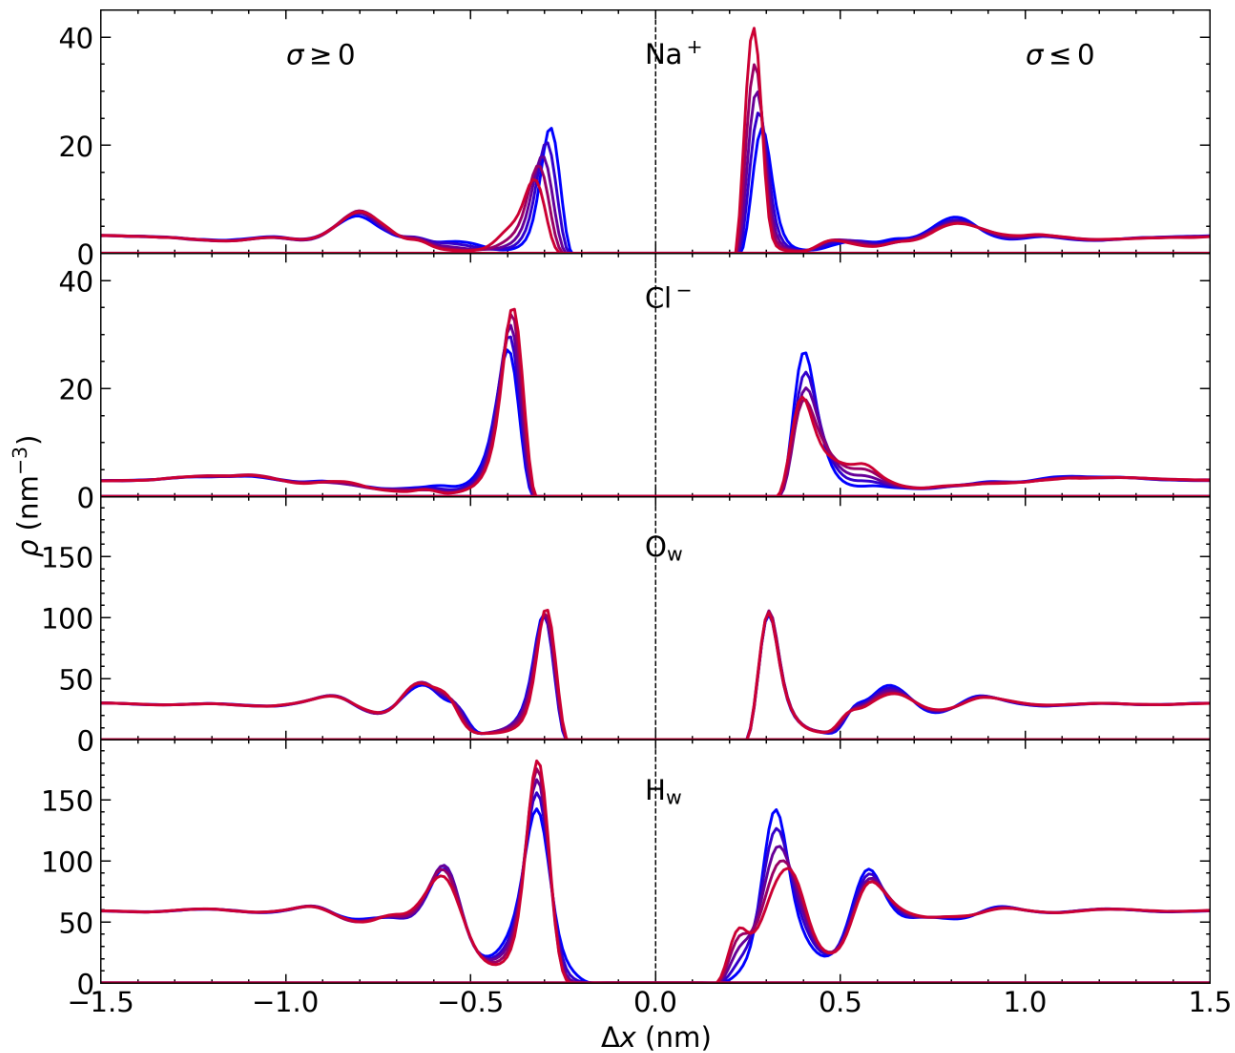

Figure S3: Water atom and ion solution densities,  $\rho$ , in the steady state determined as a function of distance from the graphite electrode,  $\Delta x$ , where the target bulk ion concentration was 5 M. The atom type is indicated on each panel. Colours blue→red indicate increasing graphite surface charge densities from  $|\sigma| = 0 \rightarrow 0.77 e \text{ nm}^{-2}$ , with data on the left and right of each panel pertaining to simulations with positive and negative applied surface charges, respectively.

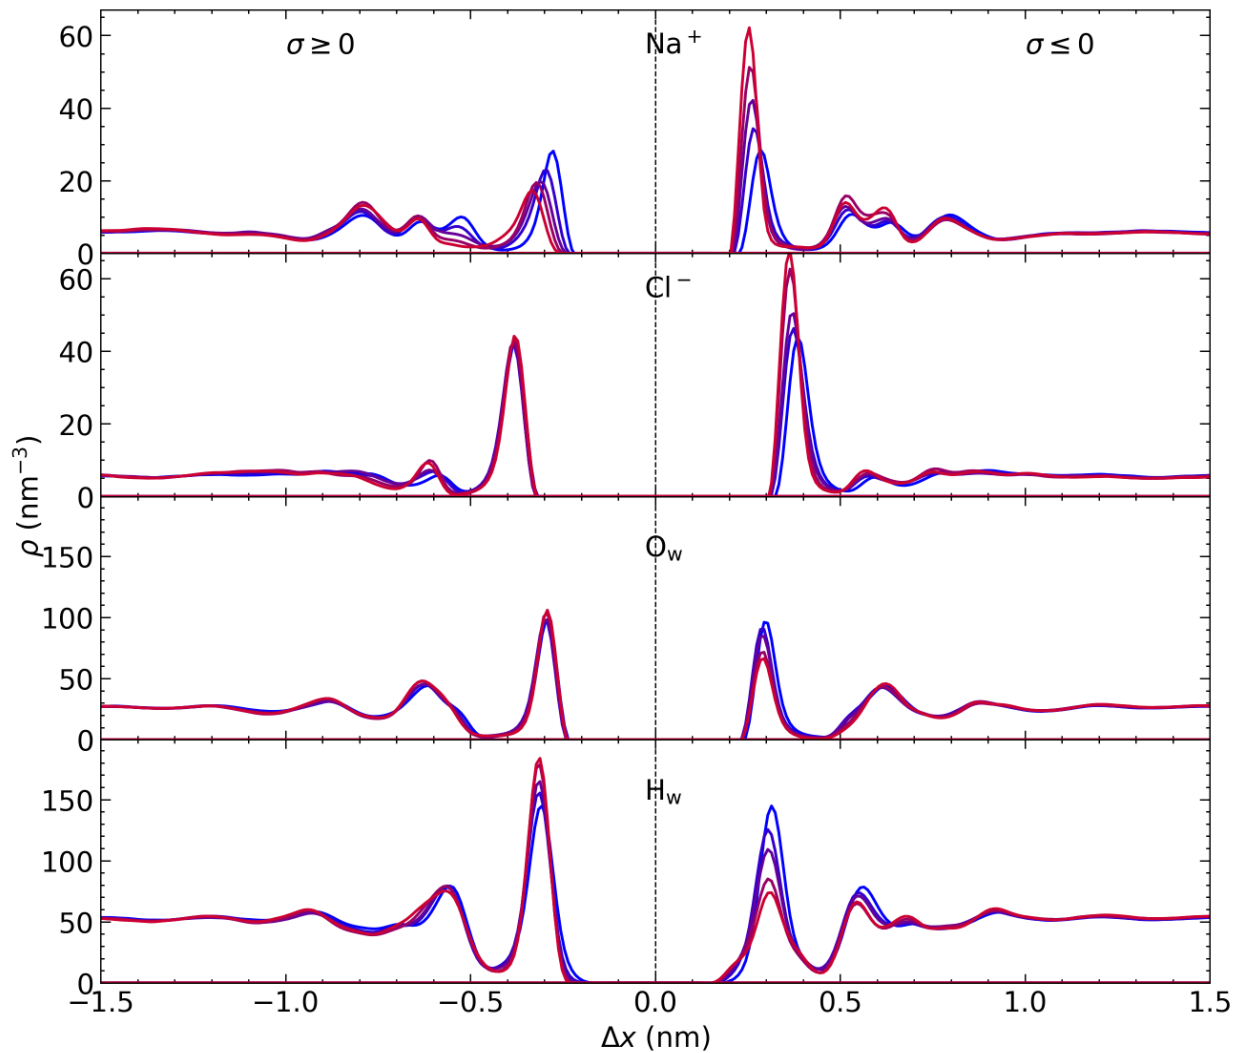

Figure S4: Water atom and ion solution densities,  $\rho$ , in the steady state determined as a function of distance from the graphite electrode,  $\Delta x$ , where the target bulk ion concentration was 10 M. The atom type is indicated on each panel. Colours blue→red indicate increasing graphite surface charge densities from  $|\sigma| = 0 \rightarrow 0.77 e \text{ nm}^{-2}$ , with data on the left and right of each panel pertaining to simulations with positive and negative applied surface charges, respectively.

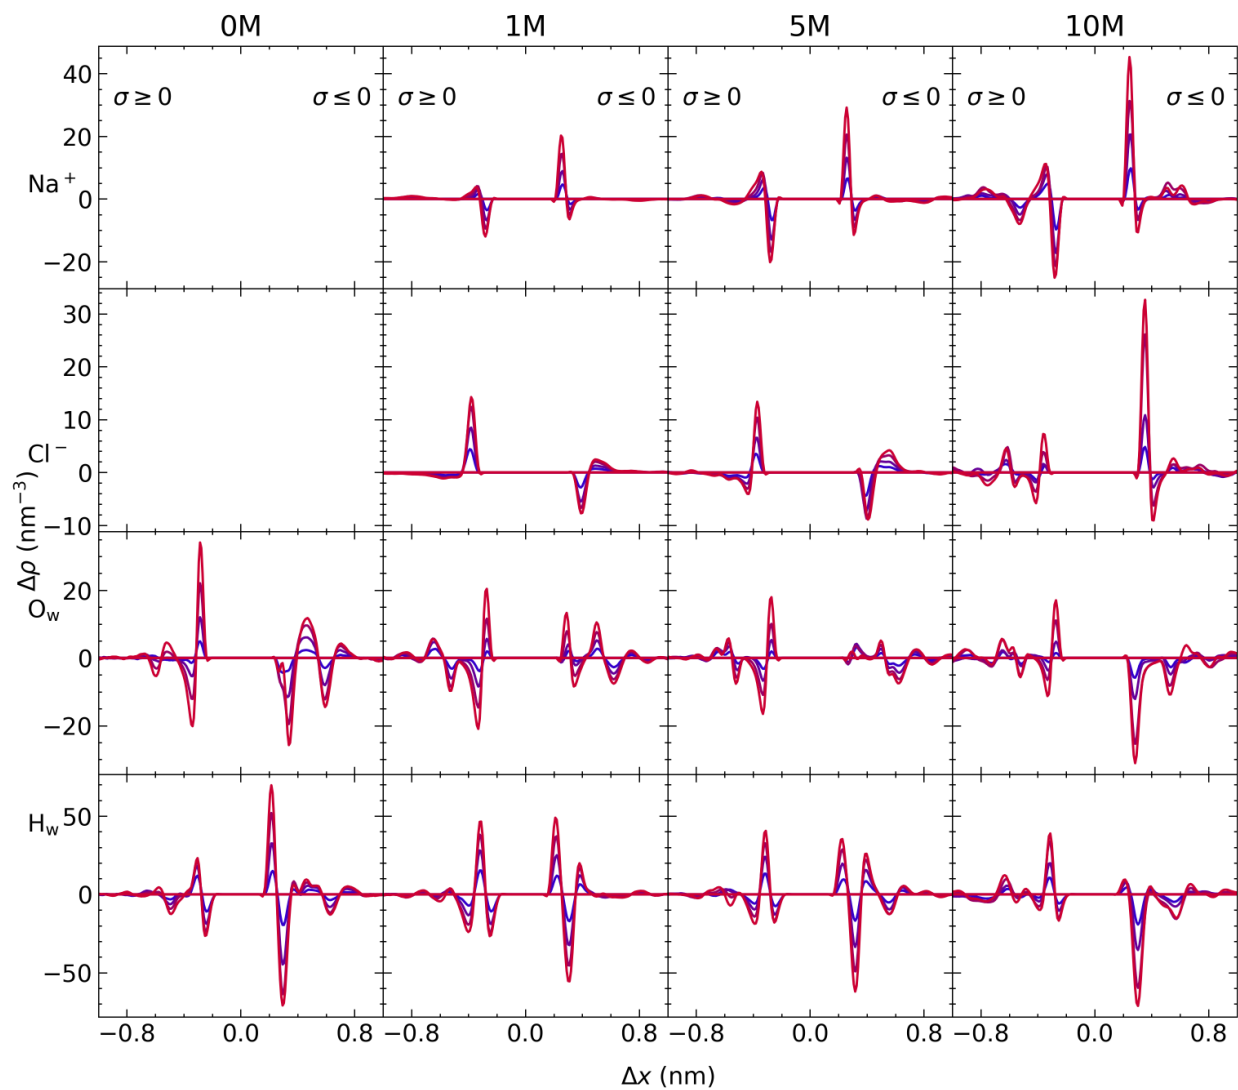

Figure S5: Change in the atom densities ( $\Delta\rho$ ) as a function of distance from the graphite electrode according to the applied surface charge density ( $|\sigma| = 0 \rightarrow 0.77 e \text{ nm}^{-2}$  as indicated by the blue→red colour scale). Atom types are provided on the left, and target bulk concentrations are indicated the top of the grid.

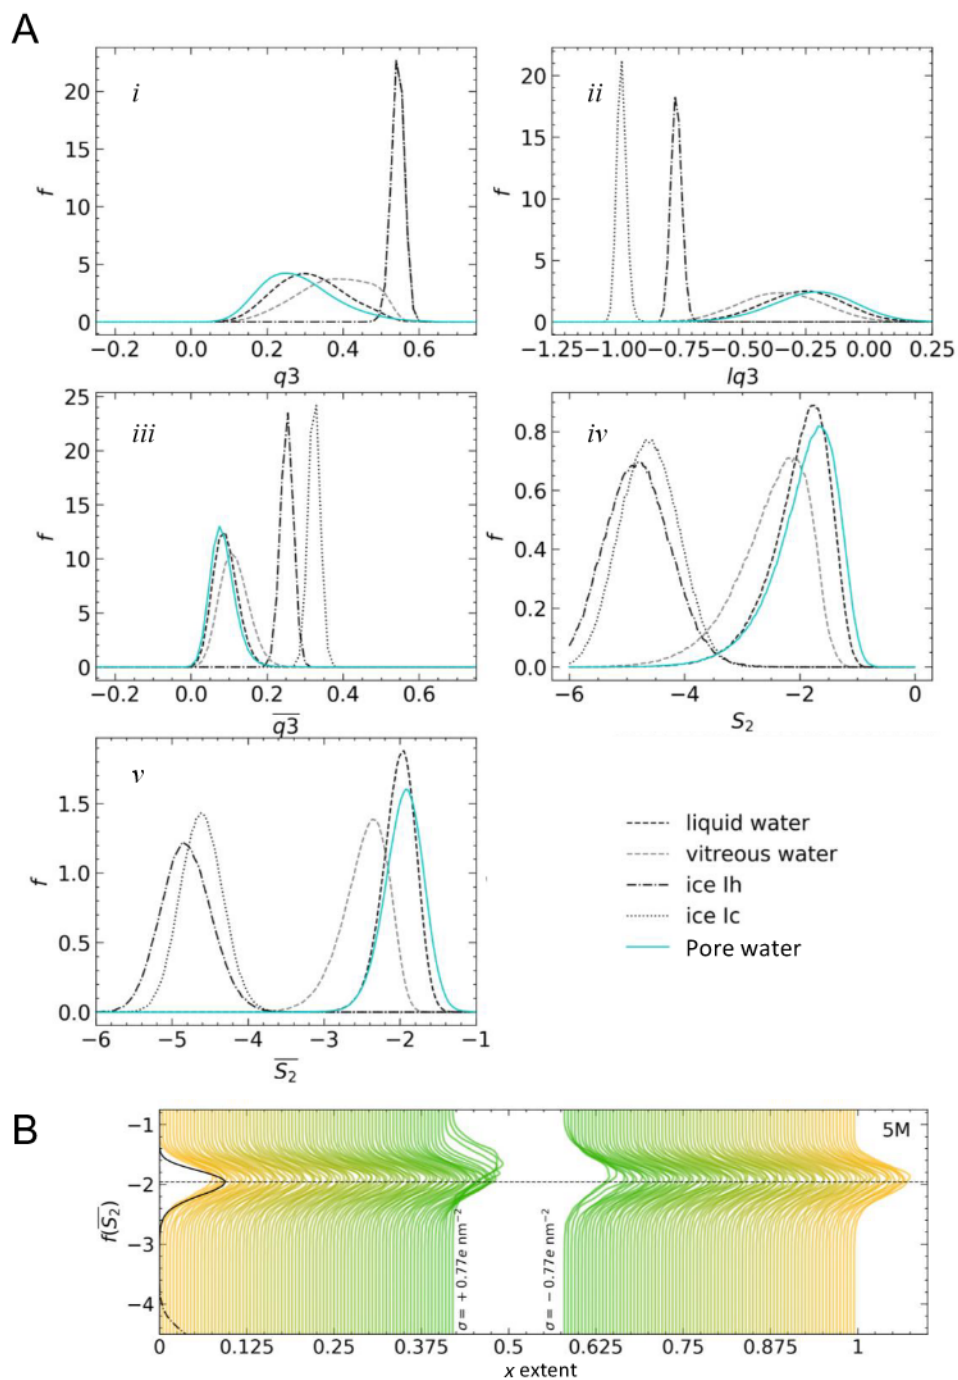

Figure S6: A) Order parameter analysis for water in  $C\mu\text{MD}$  simulations of 5 M NaCl(aq) at charged graphite with surface charge density,  $|\sigma| = 0.77 e \text{ nm}^{-2}$ . The probability density for  $q_3$  (i), local  $q_3$  (ii;  $lq_3$ ), local average  $q_3$  (iii;  $\overline{q_3}$ ), approximate pair entropy (iv;  $S_2$ ) and local average approximate pair entropy (v;  $\overline{S_2}$ ) are provided. The distributions for water in bulk liquid, vitreous (liquid water crash cooled to 100 K), hexagonal ice (ice  $I_h$ ) and cubic ice ( $I_c$ ) are also provided. B) Probability densities for  $\overline{S_2}$  in slices of the cell  $x$  axis. The bulk liquid water and ice  $I_h$  distributions are provided on the  $y$ -axis.

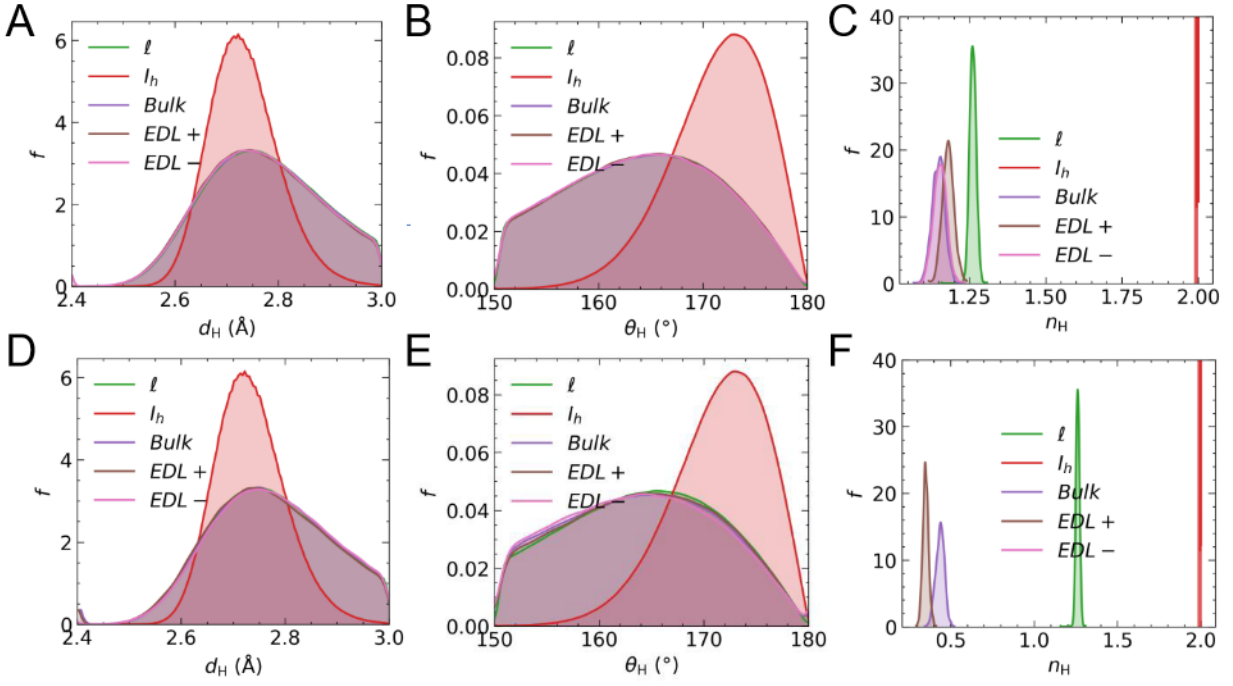

Figure S7: H-bonds for bulk liquid water ( $\ell$ ), ice  $I_h$ , and water in the bulk and EDL regions of  $C\mu$ MD simulations of graphite in contact with NaCl(aq) where the surface charge density was  $|\sigma| = 0.77 e \text{ nm}^{-2}$ .  $d_H$  and  $\theta_H$  refer to the H-bond D—H $\cdots$ A distance (A and D) and angle (B and E), respectively, where D, H and A refer to the oxygen donor, bonded hydrogen and oxygen acceptor, respectively. The number of H-bond donors per water molecule is provided in C, and F. A-C are for cases where the concentration was 0 M, while D-E provide the results from simulations at 10 M.

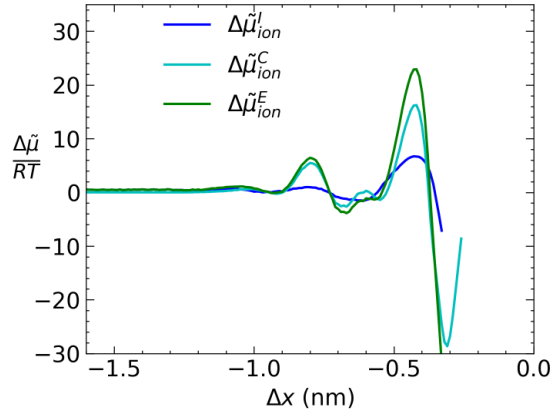

Figure S8: Contributions to the electrochemical potential of ions ( $\Delta\tilde{\mu}$ ) in solution at graphite with  $\sigma = +0.77 e \text{ nm}^{-2}$ .  $\Delta\tilde{\mu}^I = RT [\ln m_{Na}(x)m_{Cl}(x)]$ ;  $\Delta\tilde{\mu}^C = (2\omega - 1)F\psi(x)$ ; and,  $\Delta\tilde{\mu}^E = RT \ln [\gamma_{ion}(m_{Na}(x))\gamma_{ion}(m_{Cl}(x))]$ .



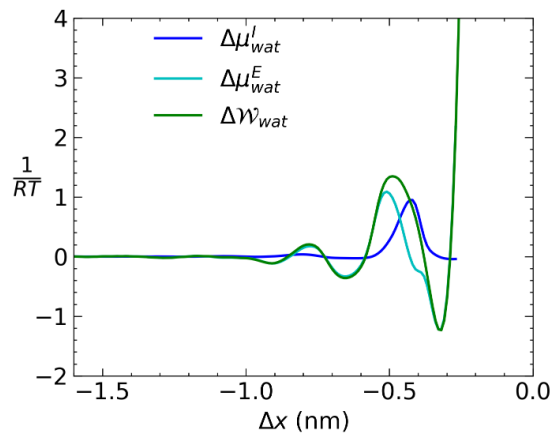

Figure S9: Contributions to  $(\Delta\mathcal{W}_{wat}(x))$  in 1 M NaCl(aq) solution at graphite with  $\sigma = +0.77e \text{ nm}^{-2}$ . See equation 14 in the main paper for details.

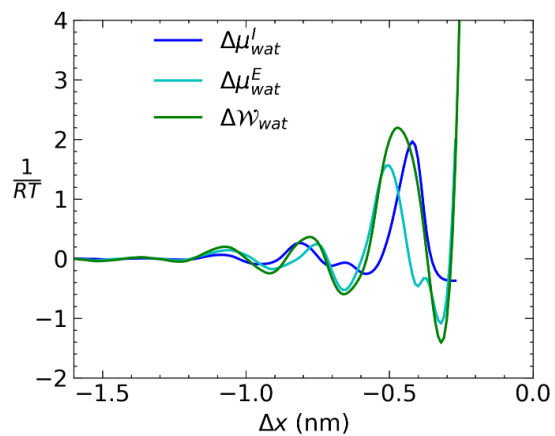

Figure S10: Contributions to  $(\Delta\mathcal{W}_{wat}(x))$  in 10 M NaCl(aq) solution at graphite with  $\sigma = +0.77e \text{ nm}^{-2}$ . See equation 14 in the main paper for details.
